# Supplementary material
Source: PubMed Central journal article supplement (PMC4737593)

**ESM Figure 1. *Fkn* and *Cx3cr1* siRNA, respectively, blocked each mRNA expression and protein levels in MMCs. *Fkn* and *Cx3cr1* siRNA transfected MMCs, *Fkn* (a) and *Cx3cr1* mRNA expression (b) were measured by real-time PCR. FKN protein levels in cell culture lysates (c) and supernatants (e) were measured by ELISA. CX3CR1 protein levels in *Cx3cr1*siRNA transfected MMCs (d) were measured by Western blot analysis. Data were shown as mean  $\pm$  SE or representative Western blots of 4 experiments. \* $p < 0.05$  vs Con or siScr, Con: control, Lipo: lipofectamin, siScr: negative siRNA, siFKN: *Fkn* siRNA, siCX3CR1: *Cx3cr1* siRNA.**

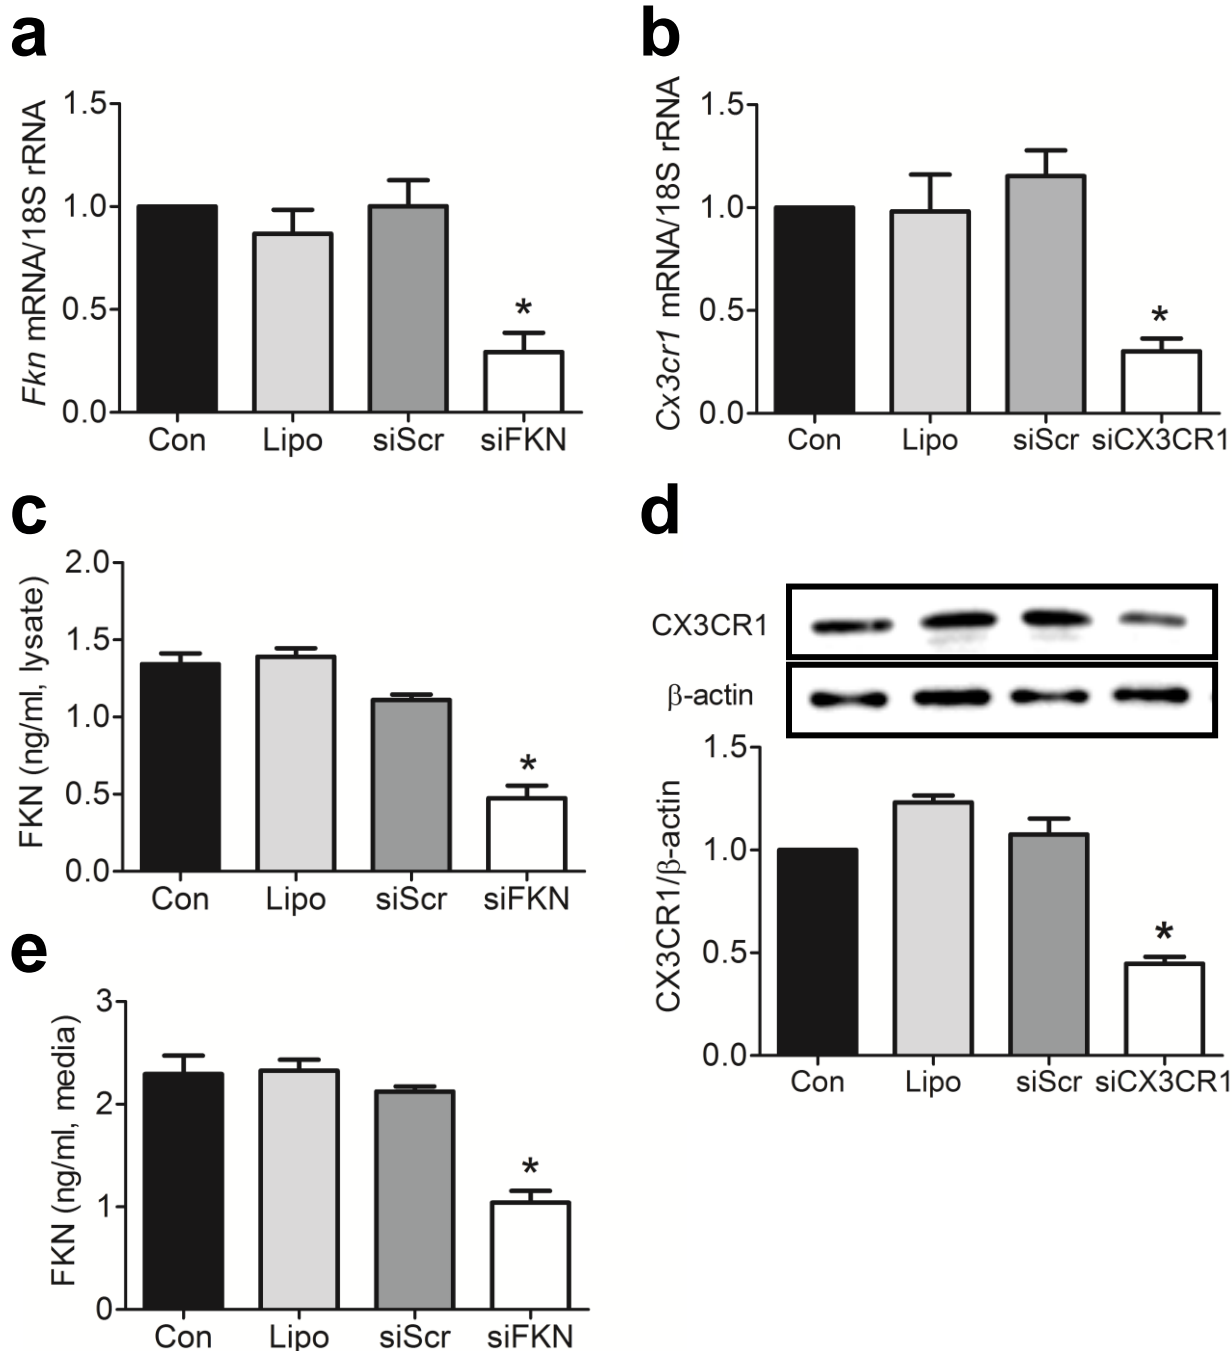

Supplement: NIHMS556846-supplement-1.pdf [file NIHMS556846-supplement-1.pdf]
