# Supplementary material
Source: PubMed Central journal article supplement (PMC4737593)

**ESM Figure 2. Diabetic stimuli increased *Fkn* and *Cx3cr1* mRNA expression in MMCs.**

*Fkn* (a) and *Cx3cr1* (b) mRNA were determined by real-time PCR. Data are mean  $\pm$  SE of four experiments. \* $p < 0.05$  vs. Con; Con, control; Man, 24.4 mmol/l mannitol; HG, 30 mmol/l D-glucose; OA, 100  $\mu$ mol/l oleic acid; TGF, 10 ng/ml transforming growth factor- $\beta$ 1.

**a**

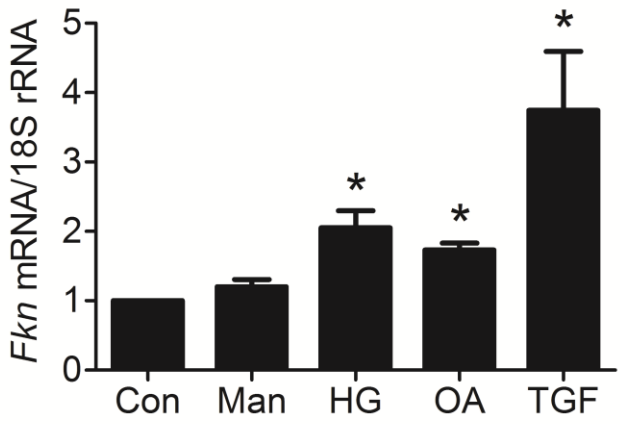

**b**

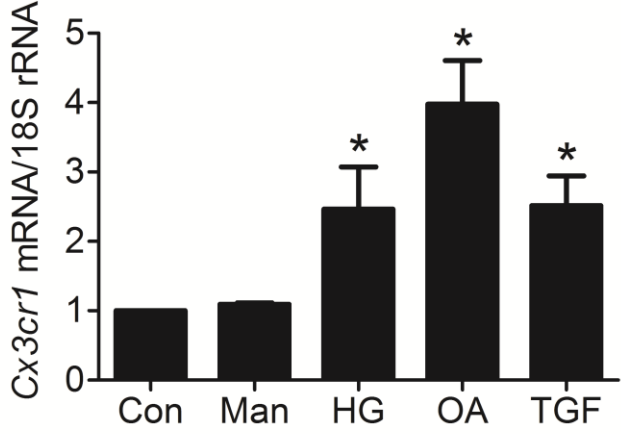

Supplement: NIHMS556846-supplement-2.pdf [file NIHMS556846-supplement-2.pdf]
