# Supplementary material
Source: PubMed Central journal article supplement (PMC4737593)

**ESM Figure 3. Diabetic stimuli increased FKN and CX3CR1 protein production in MMCs.** FKN protein levels in lysates (a) and media (b) were measured by ELISA and CX3CR1 (c-e) levels were determined by Western blot analysis. Data are mean  $\pm$  SE or representative Western blots of four experiments. \* $p < 0.05$  vs. Con; Con, control; MAN, 24.4 mmol/l mannitol; HG, 30 mmol/l D-glucose; OA, 100  $\mu$ mol/l oleic acid; TGF, 10 ng/ml transforming growth factor- $\beta$ 1.

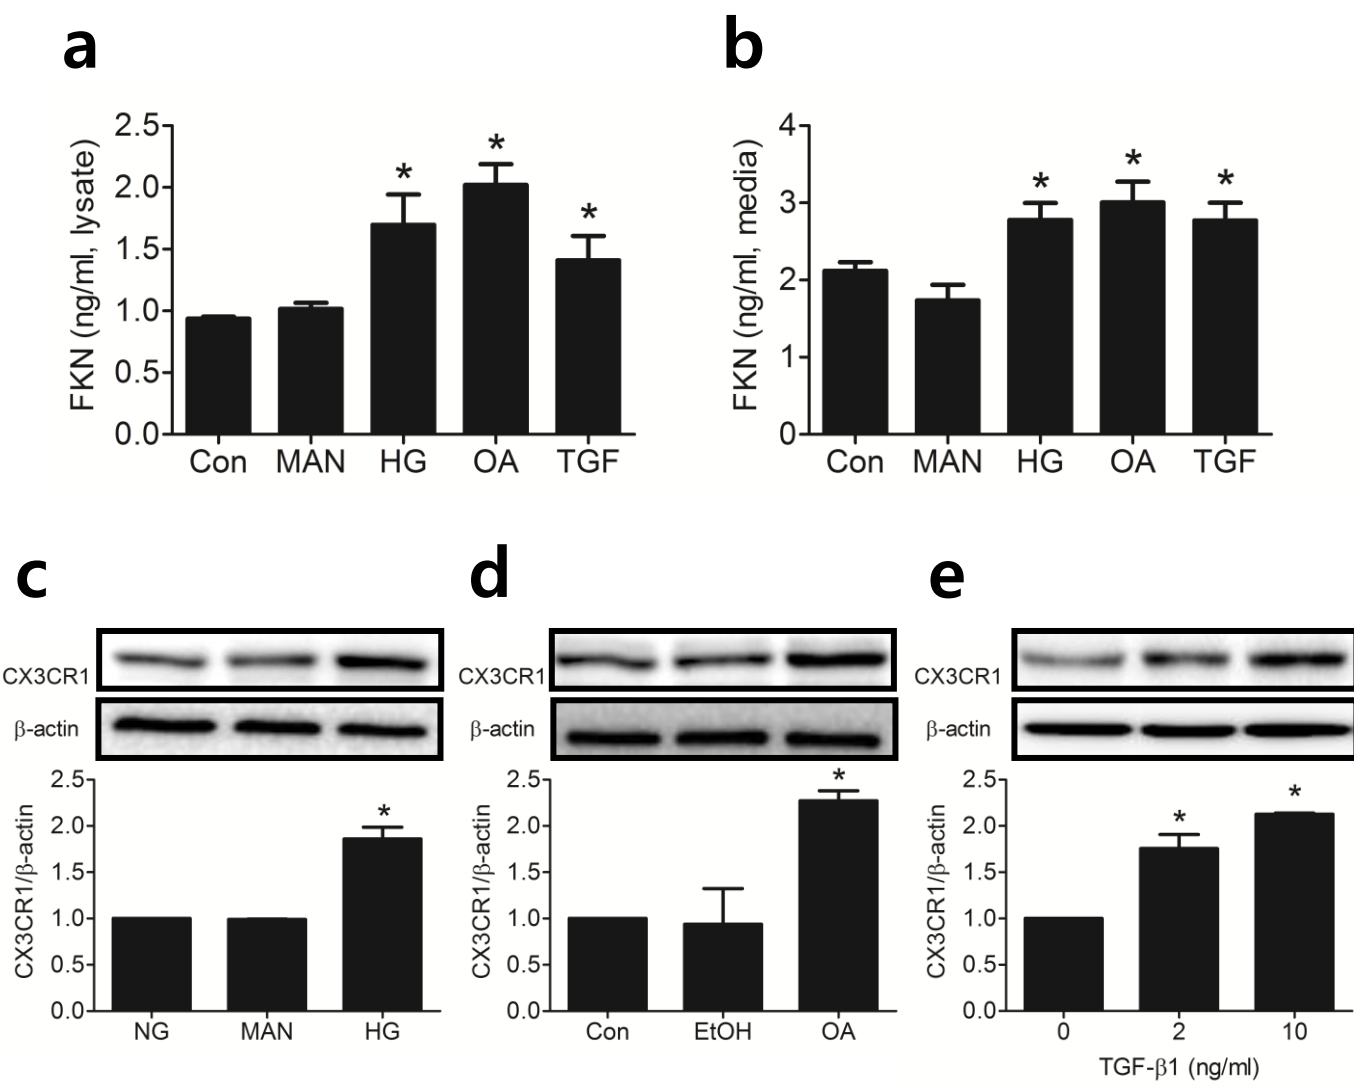

Supplement: NIHMS556846-supplement-3.pdf [file NIHMS556846-supplement-3.pdf]
