# Supplementary material
Source: PubMed Central journal article supplement (PMC4737593)

**ESM Figure 4. FKN directly induced ECM synthesis through CX3CR1 in MMCs.** Protein secretion of TGF- $\beta$ 1 (a), FN (b), and COL4 (c) were determined by ELISA or Western blot analysis. Data are mean  $\pm$  SE or representative Western blots of four experiments. \* $p < 0.05$  vs. Con; Con, control or FKN 0 ng/ml.

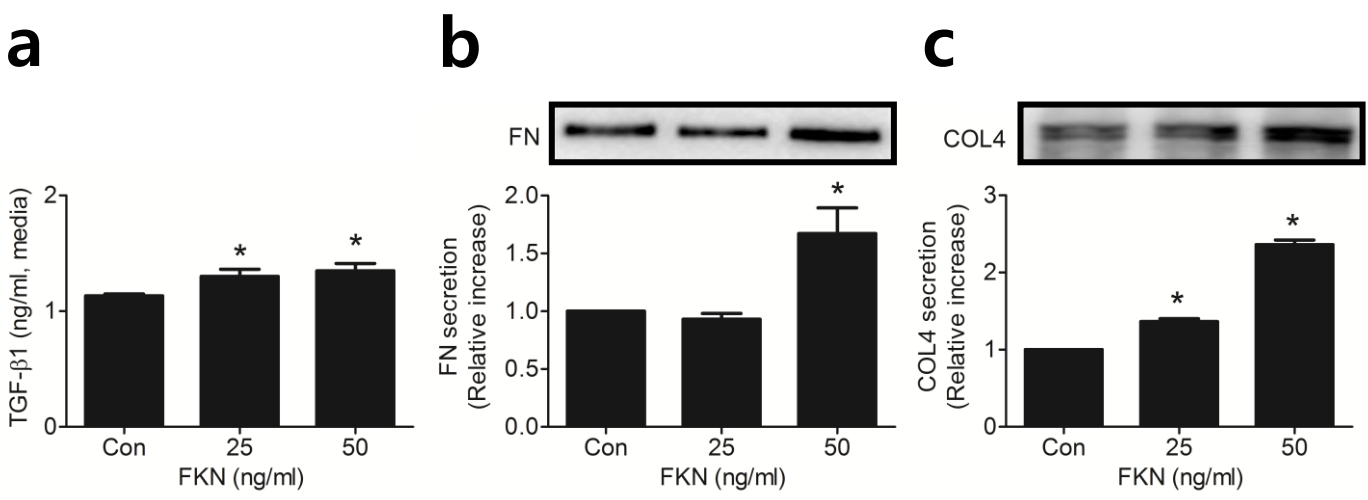

Supplement: NIHMS556846-supplement-4.pdf [file NIHMS556846-supplement-4.pdf]
