# Supplementary material
Source: PubMed Central journal article supplement (PMC4737593)
Supplement: NIHMS556846-supplement-5.pdf [file NIHMS556846-supplement-5.pdf]

**ESM Figure 5. FKN/CX3CR1 inhibited diabetes-induced ECM synthesis in MMCs.** TGF- $\beta$ 1 (a, b), FN, and COL4 (c, d) protein secretion were assessed by ELISA or Western blot analysis. Data are mean  $\pm$  SE or representative Western blots of four experiments. \* $p < 0.05$  vs. siScr without other treatments, † $p < 0.05$  vs. siScr with HG or OA; siScr, negative siRNA; siFKN, *Fkn* siRNA; siCX3CR1, *Cx3cr1* siRNA; HG, 30 mmol/l D-glucose; OA, 100  $\mu$ mol/l oleic acid; TGF, 10 ng/ml transforming growth factor- $\beta$ 1.

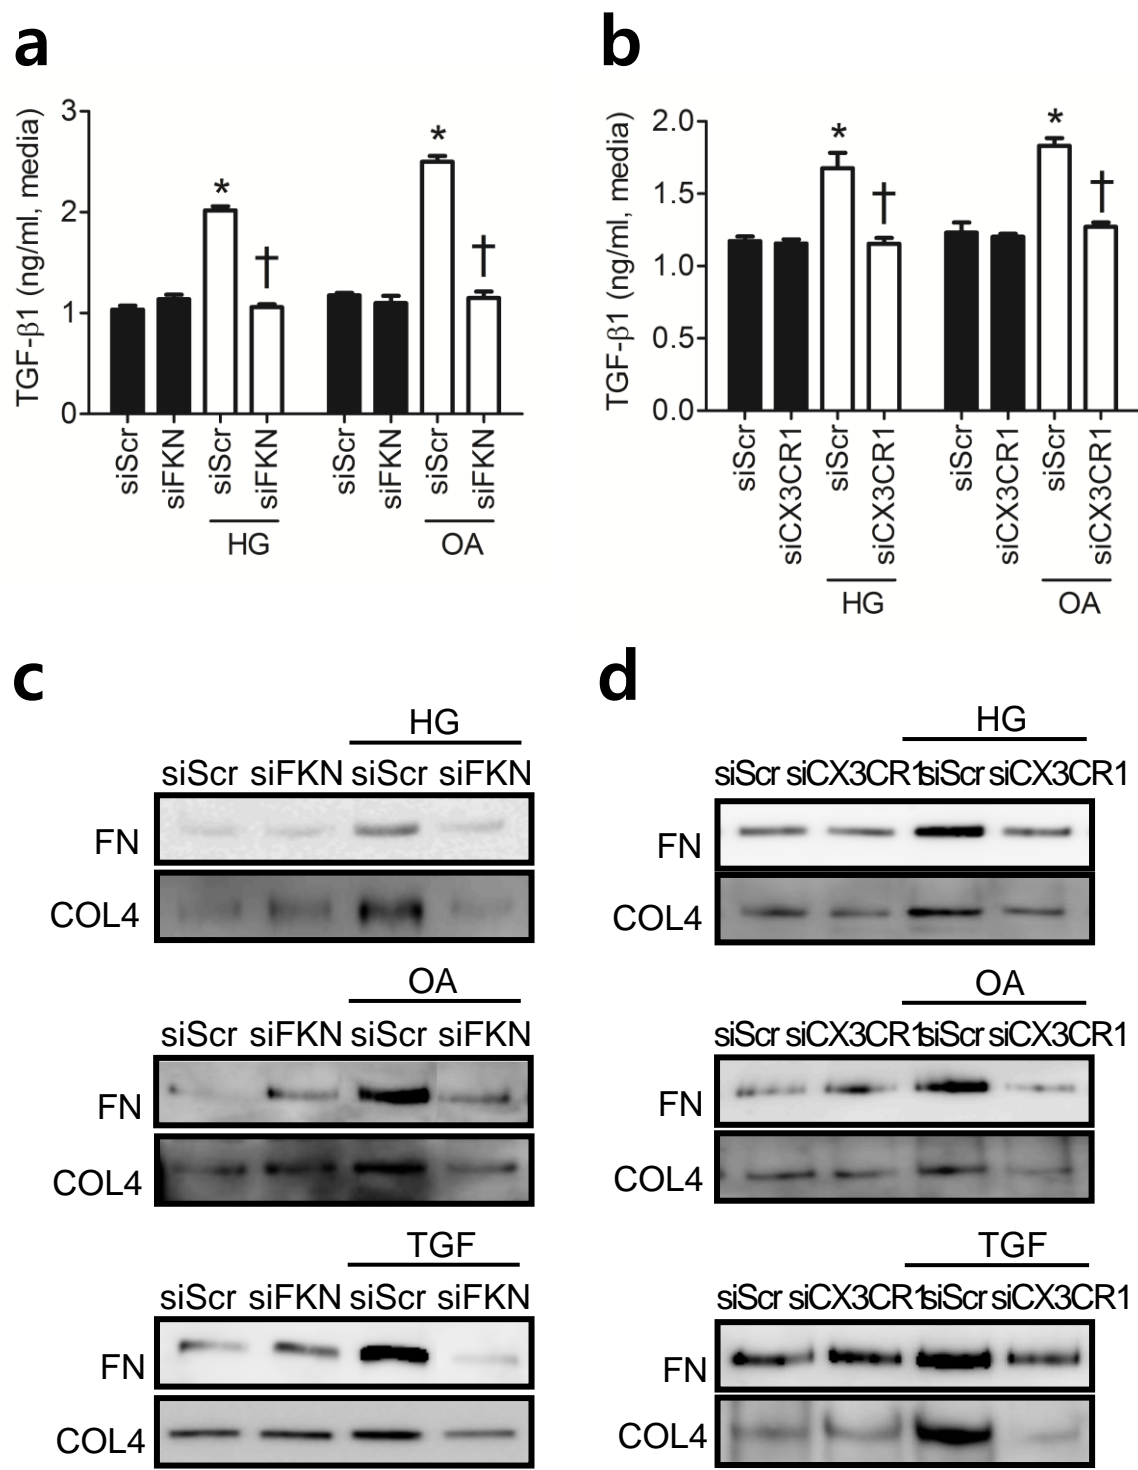

**Song et al. ESM Figure 5.**
