# Supplementary material
Source: PubMed Central journal article supplement (PMC4737593)

**ESM Figure 6. Inhibition of diabetic stimuli-induced FKN/CX3CR1 protein production and FKN-induced ECM secretion in MMCs treated with TGF- $\beta$  neutralizing antibody.** FKN (a) and CX3CR1 (b) protein levels were measured in MMCs exposed to HG and OA with or without a TGF- $\beta$  neutralizing antibody. ECM markers such as FN (c) and COL4 (d) protein production were assessed in MMCs incubated with a TGF- $\beta$  neutralizing antibody before stimulation with FKN. Data are mean  $\pm$  SE or representative Western blots of four experiments. \* $p < 0.05$  vs. Con, † $p < 0.05$  vs. HG, OA or FKN; Con, control; HG, 30 mmol/l D-glucose; OA, 100  $\mu$ mol/l oleic acid;  $\alpha$ TGF- $\beta$ , 5  $\mu$ g/ml anti-TGF- $\beta$  neutralizing antibody; FKN, 50 ng/ml fractalkine.

**a**

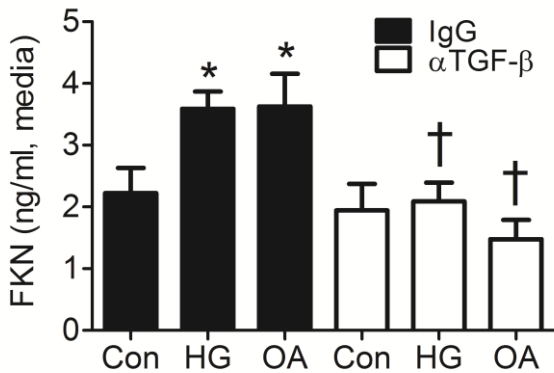

**b**

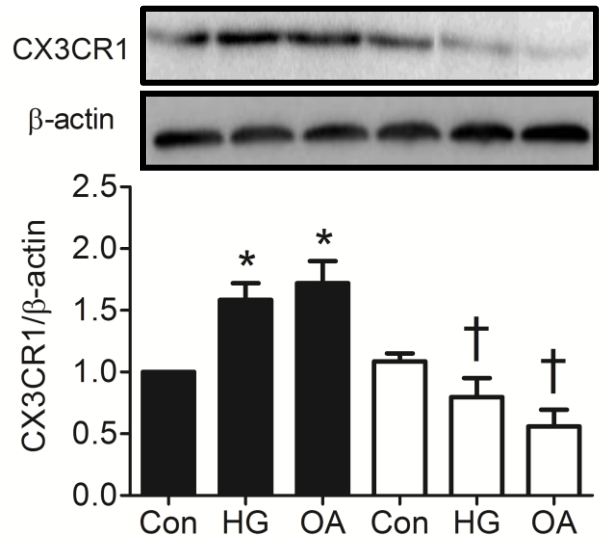

**c**

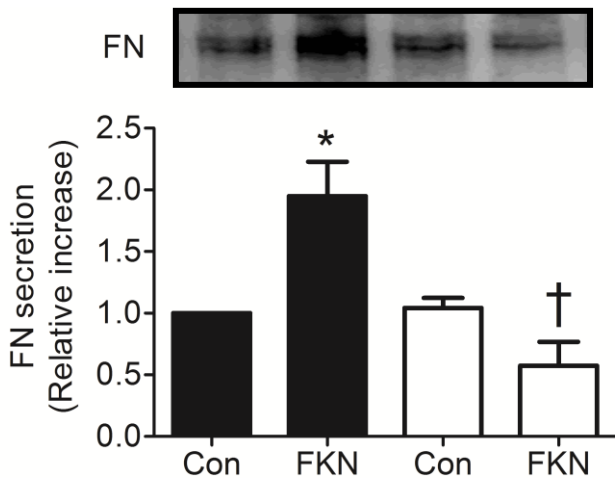

**d**

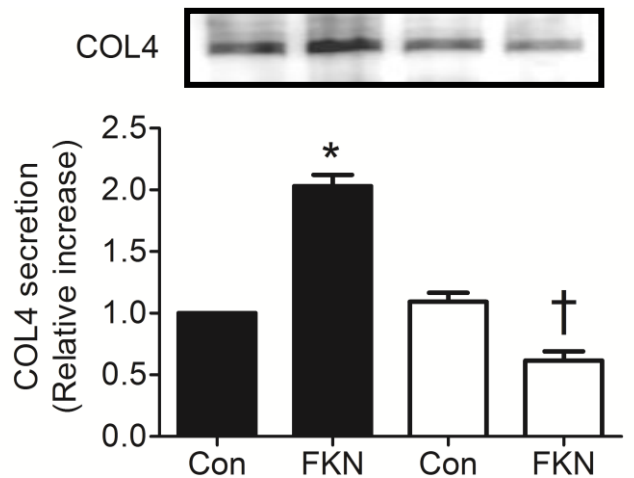

Supplement: NIHMS556846-supplement-6.pdf [file NIHMS556846-supplement-6.pdf]
