# Supplementary material
Source: PubMed Central journal article supplement (PMC4737593)
Supplement: NIHMS556846-supplement-7.pdf [file NIHMS556846-supplement-7.pdf]

ESM Table 1. Sequence of primers

| Gene name     | Forward                        | Reverse                     |
|---------------|--------------------------------|-----------------------------|
| <i>Colla1</i> | 5'-CGGATAGCAGATTGAGAACATCCG-3' | 5'-CGGCTGAGTACGGAACACACA-3' |
| <i>Colla2</i> | 5'-CAGAACATCACCTACCACTGCAA-3'  | 5'-TTCAACATCGTTGGAACCCTG-3' |
| <i>Col4a1</i> | 5'-CACGAGCTTCCCTGGTAGTCGTG-3'  | 5'-GGACAACCTTTGCTGCCTCA-3'  |
| <i>Cx3cr1</i> | 5'-CTTTGGGGGCATATTCTTCA-3'     | 5'-ACGCCCAGACTAATGGTGAC-3'  |
| <i>F4/80</i>  | 5'-CTGTAACCGGATGGCAAAC-3'      | 5'-ATGGCCAAGGCAAGACATAC-3'  |
| <i>Fn</i>     | 5'-CGGCGTATGCTGTCACCTGGCCG-3'  | 5'-AAGTTGAAGGCAGCCACCTG-3'  |
| <i>Fkn</i>    | 5'-GGCTAAGCCTCAGAGCATTG-3'     | 5'-CTGTAGTGGAGGGGGACTCA-3'  |
| <i>Mcp-1</i>  | 5'-CCCAATGAGTAGGCTGGAGA-3'     | 5'-TCTGGACCCATTCCTTCTTG-3'  |
| <i>Tgf-β1</i> | 5'-GGACTCTCCACCTGCAAGAC-3'     | 5'-GACTGGCGAGCCTTAGITTTG-3' |
| <i>18S</i>    | 5'-CGAAAGCATTGCCAAGAAT-3'      | 5'-AGTCGGCATCGTTTATGGTC-3'  |
| <b>siRNA</b>  |                                |                             |
| <i>Cx3cr1</i> | 5'-CCUUCUUCUUCUUCUUGGCUUTT-3'  | 5'-AAGCCAAUGAAGAAGAAGGTT-3' |
| <i>Fkn</i>    | 5'-CCGCGUUCUUCUUCUUGUGTT-3'    | 5'-CACAAAUGGAAGAACGCGGTT-3' |
