# Supplementary material
Source: PubMed Central journal article supplement (PMC4737593)
Supplement: NIHMS556846-supplement-8.pdf [file NIHMS556846-supplement-8.pdf]

ESM Table 2. Characteristics of experimental animals

|                                  | Control    |            | Diabetes    |             |
|----------------------------------|------------|------------|-------------|-------------|
|                                  | CX3CR1 +/+ | CX3CR1 -/- | CX3CR1 +/+  | CX3CR1 -/-  |
| Body weight (g)                  | 30±1       | 29±2       | 22±1*       | 20±1*       |
| Blood glucose (mg/dl)            | 162±11     | 172±9      | 549±13*     | 531±22*     |
| HbA <sub>1c</sub> (%)            | 4.53±0.09  | 4.46±0.10  | 10.00±0.42* | 11.00±0.66* |
| Kidney weight (g)                | 0.19±0.01  | 0.18±0.01  | 0.22±0.01*  | 0.24±0.01*  |
| Triacylglycerol (mg/dl)          | 9.6±0.7    | 9.4±0.8    | 69.8±10.1*  | 75.3±8.1*   |
| Total cholesterol (mg/dl)        | 89.5±4.3   | 82.7±5.0   | 92.6±6.1    | 93.6±8.9*   |
| Urine protein excretion (mg/24h) | 1.0±0.3    | 0.9±0.2    | 4.0±0.7*    | 3.8±1.0*    |

Data were shown as mean ± SE of 8~12 mice. \*p < 0.05 vs Control CX3CR1 +/+
